# Supplementary material for: Effect of GM1 concentration change on plasma membrane: molecular dynamics simulation and analysis
Source: Royal Society of Chemistry journal article supplement (doi:10.1039/d3cp06161b), 2024-01-01
Supplement: d3cp06161b1.pdf [file d3cp06161b1.pdf]

Effect of GM1 concentration change on plasma membrane: molecular  
dynamics simulation and analysis

Yongkang Lyu, Shuo Chen, Yu Zhao, Hongxiu Yuan, Chenyang Zhang, Changzhe Zhang and  
Qingtian Meng \*

\* Corresponding author. School of Physics and Electronics, Shandong Normal University, Jinan,  
250014, People's Republic of China.

E-mail addresses: qtmeng@sdu.edu.cn

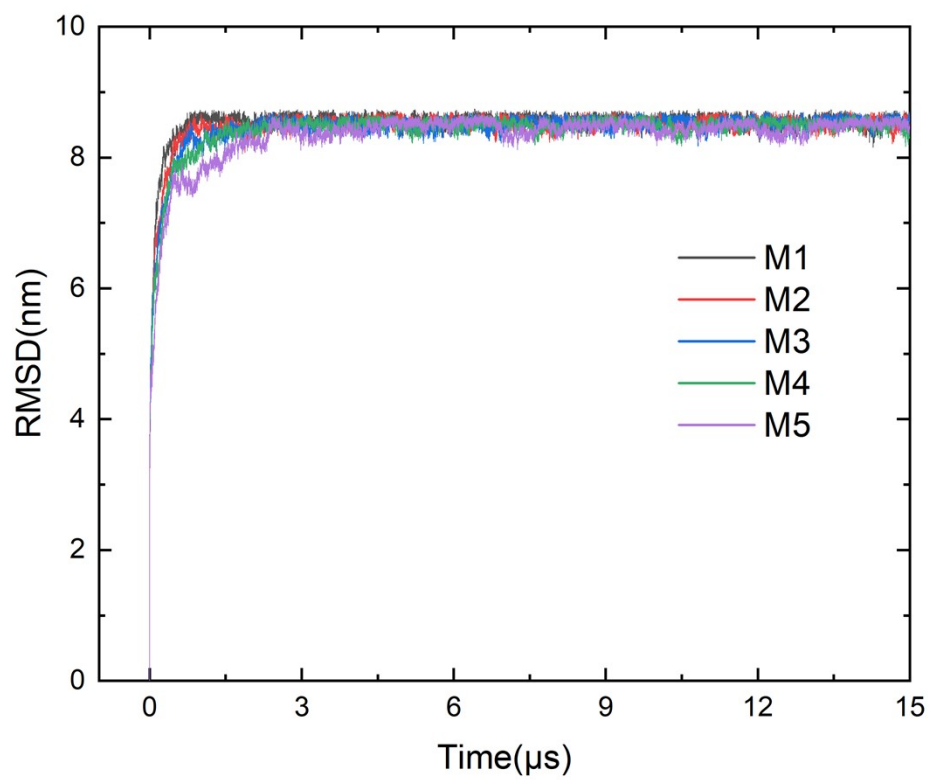

**Fig. S1.** RMSD of all the simulation systems.

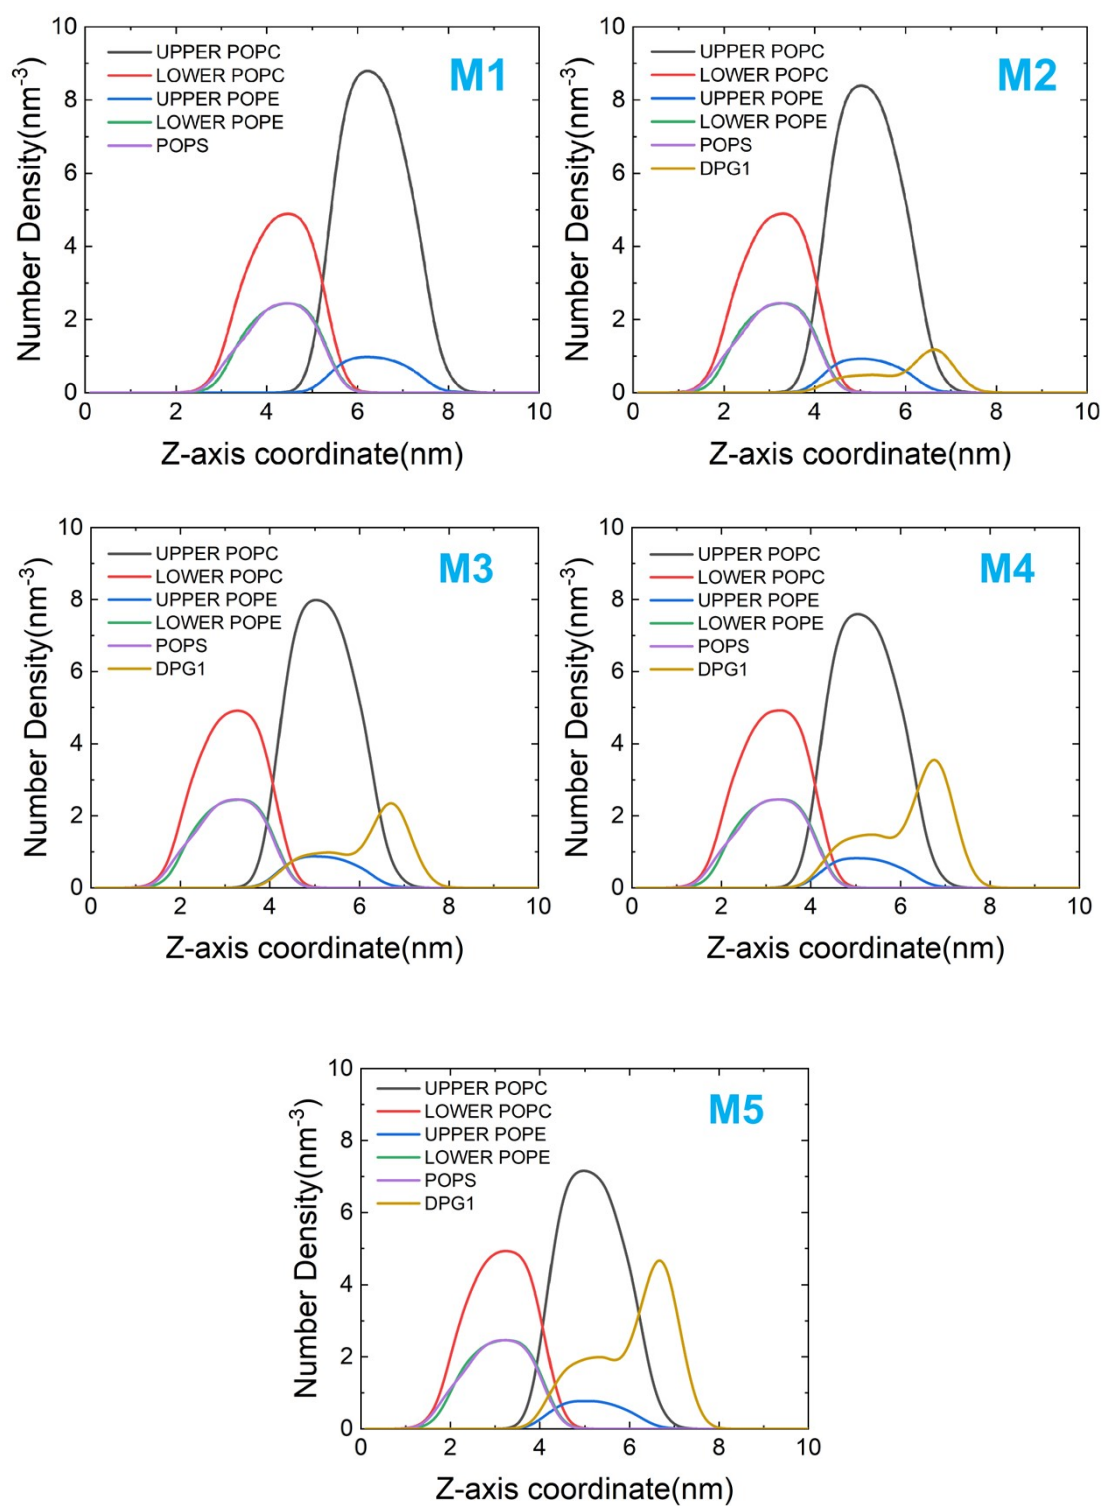

**Fig. S2.** Number density profiles of lipids measured along the membrane normal.

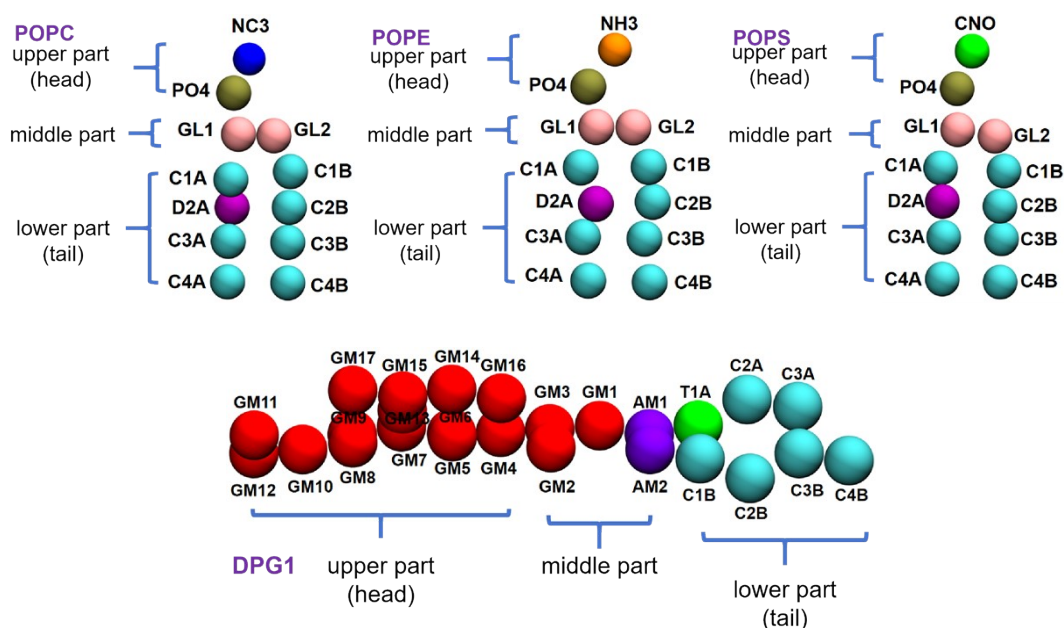

**Fig. S3.** Division of different regions of lipid molecules in the discussion of section 3.8. It should be noted that in lipidomics, the hydrophilic phosphate group is generally considered as the lipid head, and the hydrophobic alkyl chain as the lipid tail. The division here is a relatively arbitrary classification made for the convenience of discussion within the context of the main text.

**Table. S1.** The proportions of contacts between lipids in the two leaflets of membrane systems. The number in parentheses indicates the number of that item.

| <b>M2 UPPER</b> | POPC         | POPE      | DPG1        |
|-----------------|--------------|-----------|-------------|
| POPC            | 76.6%(10015) | 3.3%(429) | 2.1%(274)   |
| POPE            | 3.3%(429)    | 5.5%(719) | 0.2%(32)    |
| DPG1            | 2.1%(274)    | 0.2%(32)  | 12.3%(1606) |

| <b>M2 LOWER</b> | POPC        | POPE        | POPS        |
|-----------------|-------------|-------------|-------------|
| POPC            | 45.2%(4891) | 6.1%(660)   | 6.2%(669)   |
| POPE            | 6.1%(660)   | 19.5%(2109) | 3.1%(333)   |
| POPS            | 6.2%(669)   | 3.1%(333)   | 19.9%(2157) |

| <b>M3 UPPER</b> | POPC        | POPE      | DPG1        |
|-----------------|-------------|-----------|-------------|
| POPC            | 65.6%(9326) | 2.7%(384) | 3.8%(535)   |
| POPE            | 2.7%(384)   | 4.8%(676) | 0.4%(62)    |
| DPG1            | 3.8%(535)   | 0.4%(62)  | 22.8%(3247) |

| <b>M3 LOWER</b> | POPC        | POPE        | POPS        |
|-----------------|-------------|-------------|-------------|
| POPC            | 45.2%(4912) | 6.1%(664)   | 6.2%(675)   |
| POPE            | 6.1%(664)   | 19.5%(2120) | 3.1%(333)   |
| POPS            | 6.2%(675)   | 3.1%(333)   | 19.9%(2164) |

| <b>M4 UPPER</b> | POPC        | POPE      | DPG1        |
|-----------------|-------------|-----------|-------------|
| POPC            | 56.0%(8646) | 2.2%(340) | 5.0%(775)   |
| POPE            | 2.2%(340)   | 4.1%(630) | 0.6%(91)    |
| DPG1            | 5.0%(775)   | 0.6%(91)  | 32.1%(4947) |

| <b>M4 LOWER</b> | POPC        | POPE        | POPS        |
|-----------------|-------------|-------------|-------------|
| POPC            | 45.2%(4933) | 6.1%(664)   | 6.2%(681)   |
| POPE            | 6.1%(664)   | 19.5%(2126) | 3.1%(339)   |
| POPS            | 6.2%(681)   | 3.1%(339)   | 19.8%(2165) |

| <b>M5 UPPER</b> | POPC        | POPE      | DPG1        |
|-----------------|-------------|-----------|-------------|
| POPC            | 47.7%(7941) | 1.8%(293) | 6.0%(999)   |
| POPE            | 1.8%(293)   | 3.6%(591) | 0.7%(116)   |
| DPG1            | 6.0%(999)   | 0.7%(116) | 40.3%(6699) |

| <b>M5 LOWER</b> | POPC        | POPE        | POPS        |
|-----------------|-------------|-------------|-------------|
| POPC            | 45.3%(4956) | 6.1%(671)   | 6.3%(686)   |
| POPE            | 6.1%(671)   | 19.5%(2136) | 3.1%(340)   |
| POPS            | 6.3%(686)   | 3.1%(340)   | 19.8%(2175) |

|       |         |       |
|-------|---------|-------|
| < 15% | 15%~30% | > 30% |
|-------|---------|-------|

**Table. S2.** 2D diffusion coefficients. The first two tables list the 2D diffusion rates of various lipids in the upper and lower leaflets of the membrane systems, while the last table shows that of the entire membrane, including both leaflets. The mathematical unit of the 2D diffusion coefficient is  $10^{-7}\text{cm}^2\cdot\text{s}^{-1}$ .

| UPPER   | M1        | M2        | M3        | M4        | M5        |
|---------|-----------|-----------|-----------|-----------|-----------|
| POPC    | 2.46±0.04 | 1.88±0.09 | 1.18±0.07 | 0.78±0.08 | 0.44±0.06 |
| POPE    | 1.97±0.14 | 1.65±0.40 | 1.05±0.25 | 0.87±0.07 | 0.43±0.09 |
| DPG1    |           | 0.99±0.13 | 0.70±0.18 | 0.44±0.09 | 0.26±0.06 |
| LOWER   | M1        | M2        | M3        | M4        | M5        |
| POPC    | 2.46±0.54 | 2.21±0.11 | 2.18±0.60 | 2.11±0.35 | 1.72±0.00 |
| POPE    | 2.35±0.05 | 2.34±0.21 | 1.97±0.19 | 1.86±0.08 | 1.73±0.16 |
| POPS    | 2.46±0.24 | 2.32±0.73 | 2.36±0.21 | 2.14±0.37 | 2.00±0.14 |
| BILAYER | M1        | M2        | M3        | M4        | M5        |
| UPPER   | 2.41±0.05 | 1.76±0.03 | 1.14±0.04 | 0.69±0.08 | 0.38±0.06 |
| LOWER   | 2.43±0.31 | 2.31±0.12 | 2.24±0.41 | 2.08±0.05 | 1.86±0.11 |
